# Supplementary material for: Haematopoietic stem and progenitor cells from human pluripotent stem cells
Source: PubMed Central journal article supplement (PMC5872146; doi:10.1038/nature22370), 2017-05-17
Supplement: NIHMS898882-supplement-Supplemental.pdf [file NIHMS898882-supplement-Supplemental.pdf]

## Uncropped gel data

ED 4c iPSC -1

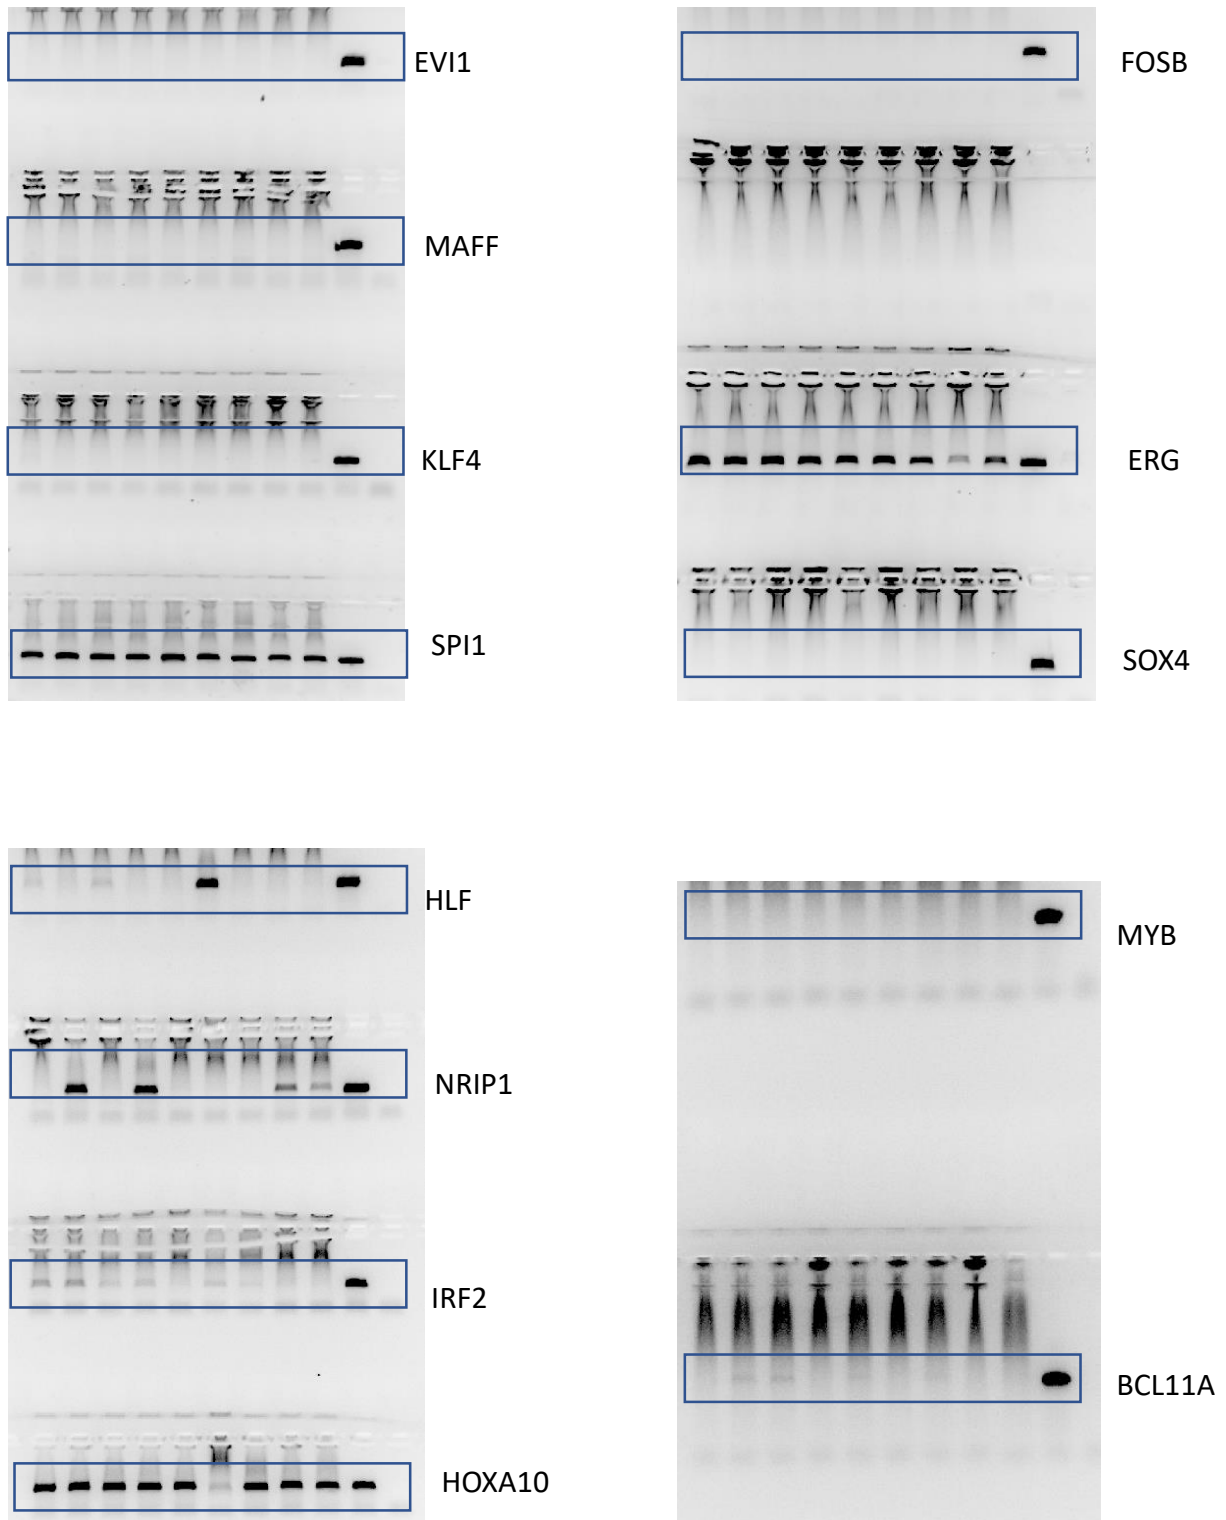

Uncropped gel data

ED 4c iPSC -2

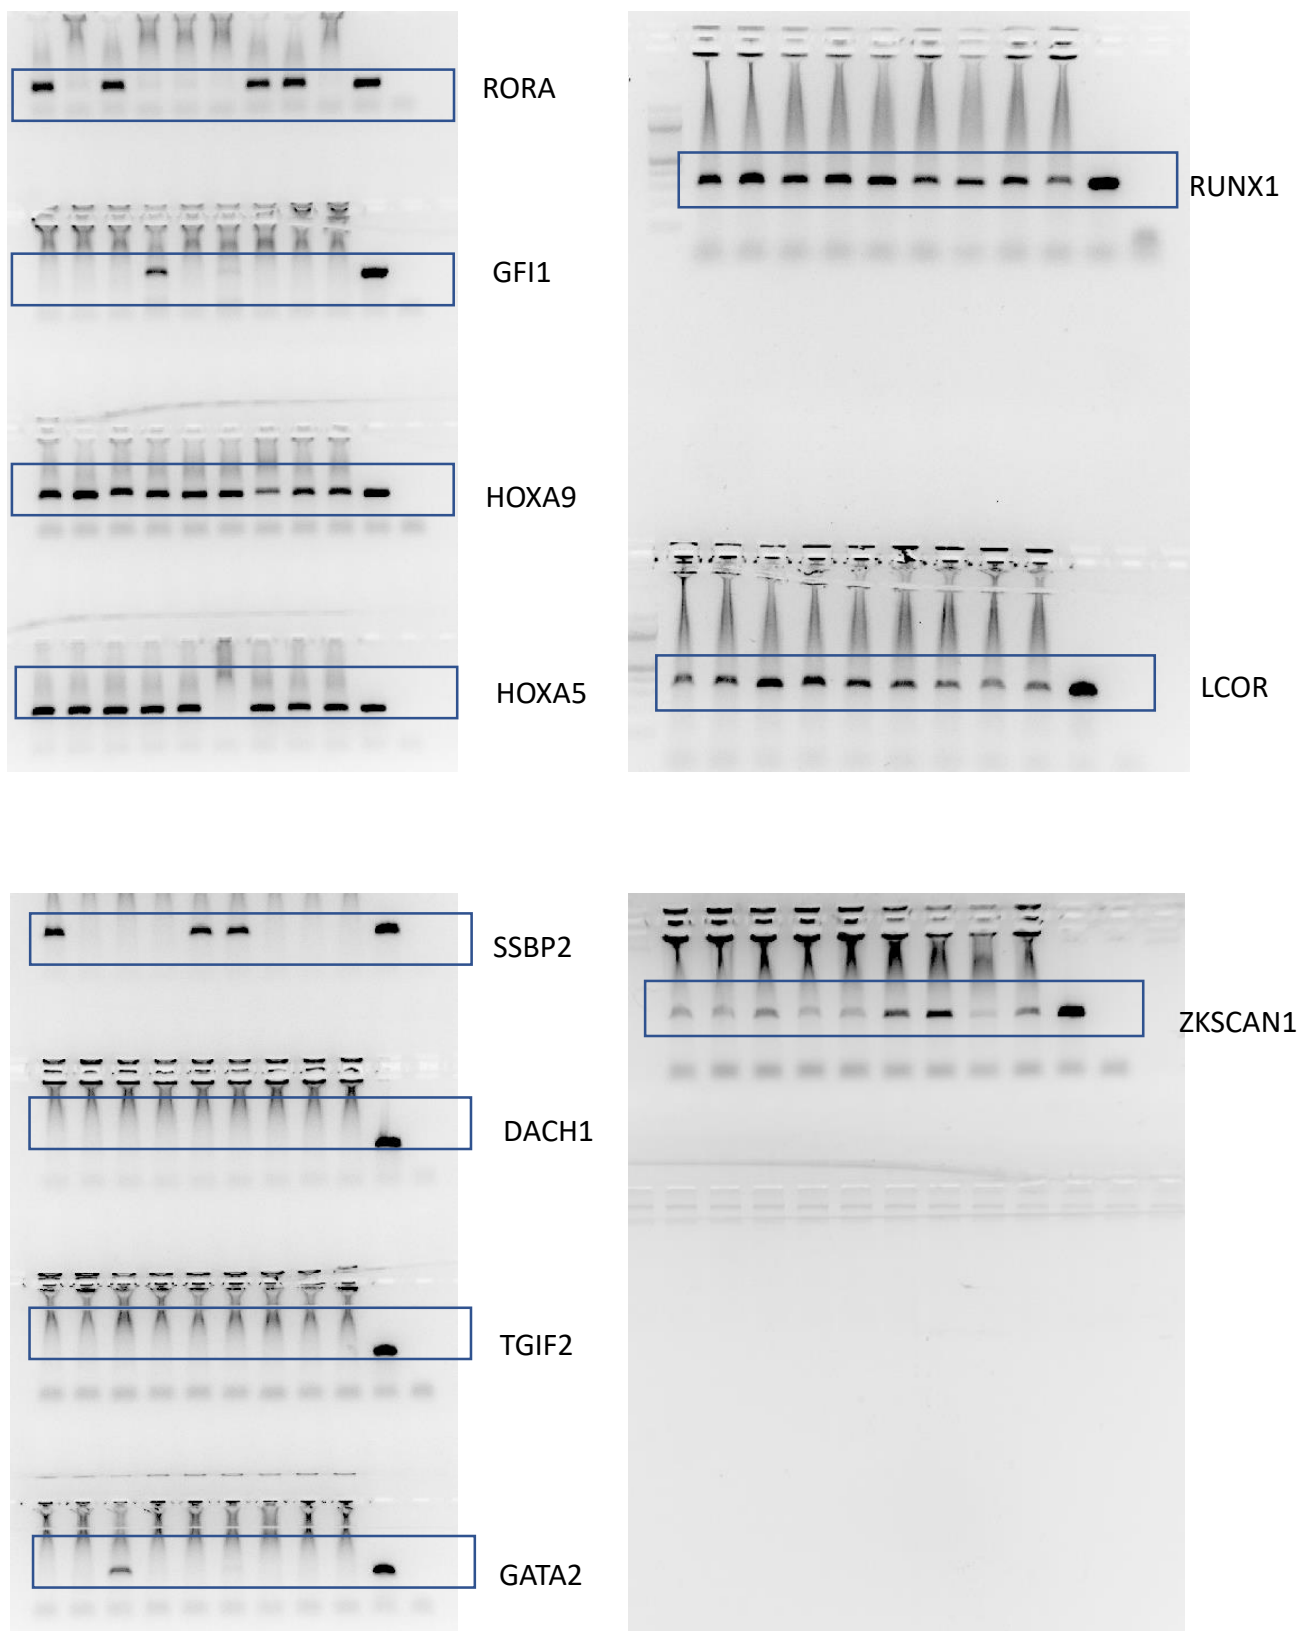

Uncropped gel data

ED 4c hESC -1

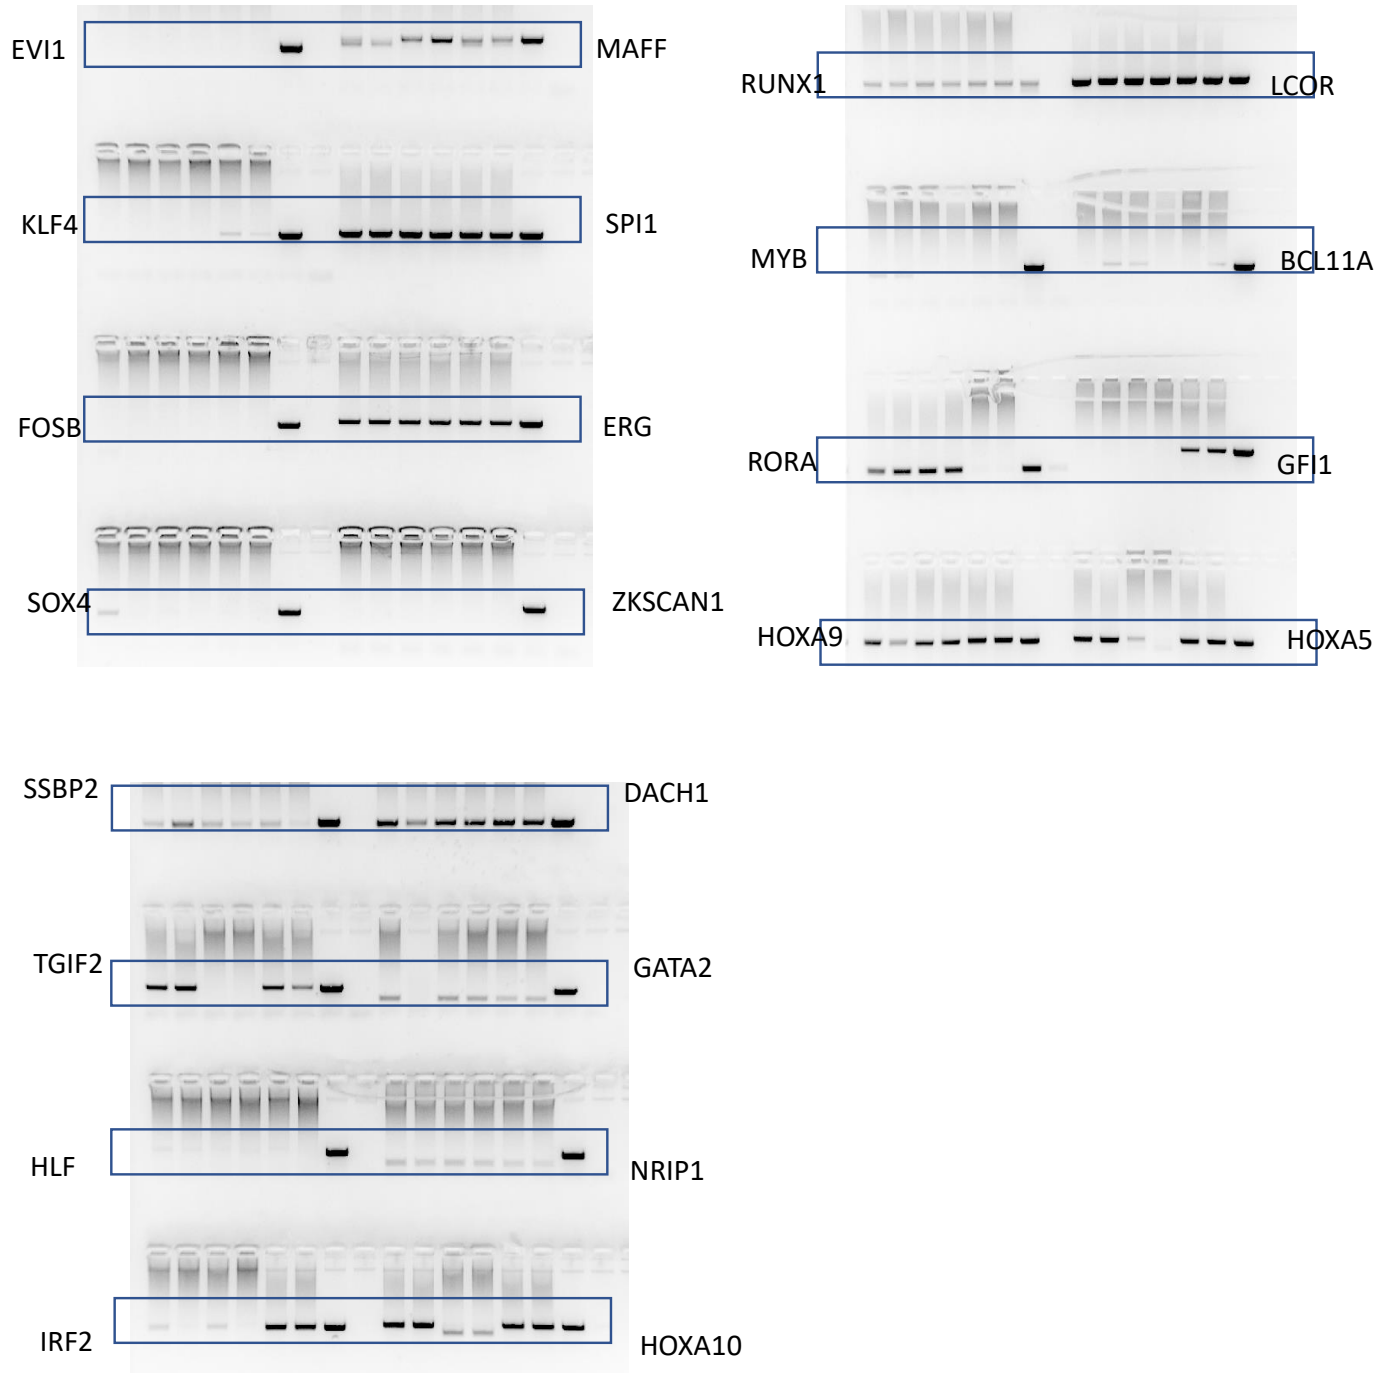

Uncropped gel data

ED 4c hESC -2

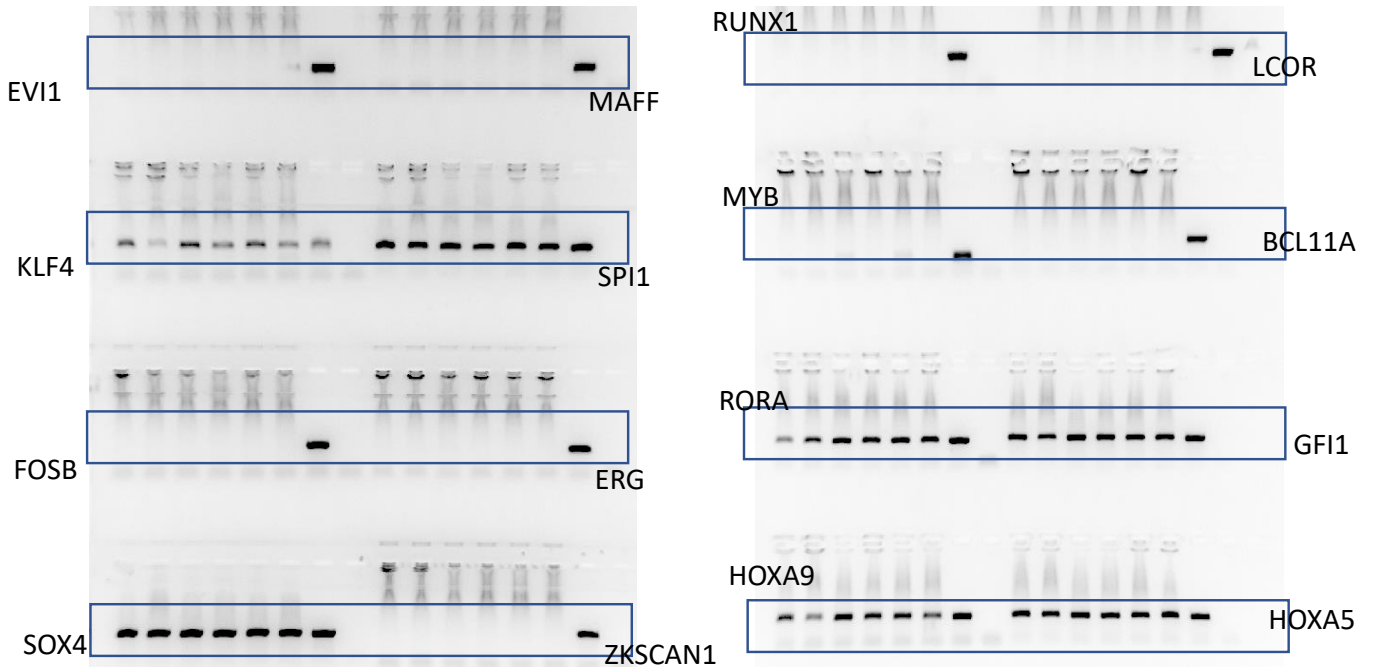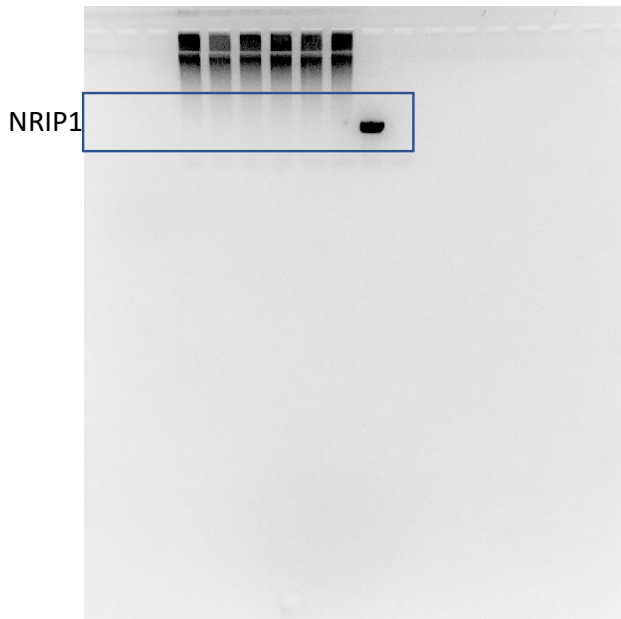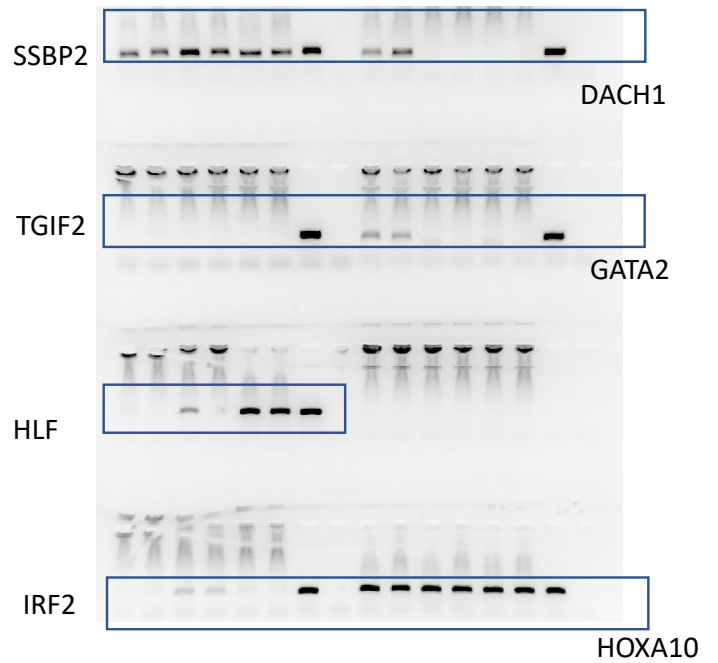

Uncropped gel data

ED 5e

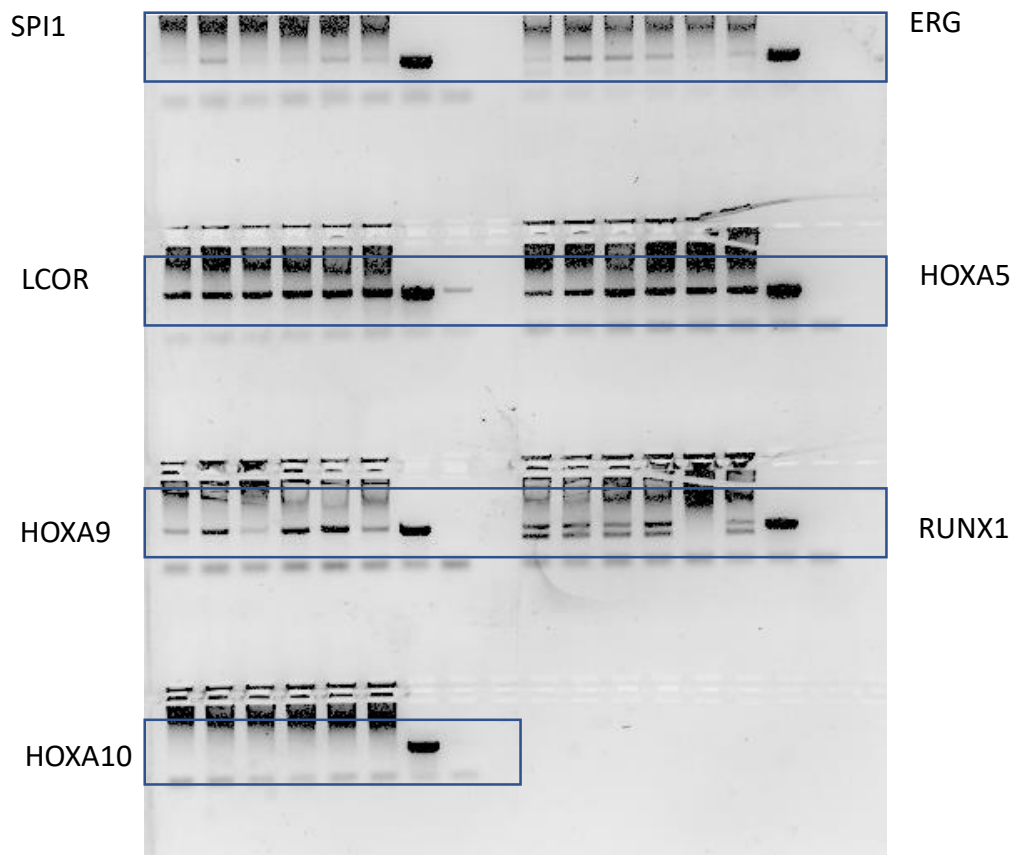

**Comparison with CB-HSCs**

|                                          | <b>7TF HSPC</b>                             | <b>CB-HSC</b>                            |
|------------------------------------------|---------------------------------------------|------------------------------------------|
| <b>Sustainability</b>                    | <b>Secondary - 14 weeks</b>                 | <b>Tertiary</b>                          |
| <b>Multilineage</b>                      | <b>Yes, but CD8+ T cells</b>                | <b>Yes</b>                               |
| <b>Multipotent clonality</b>             | <b>Yes</b>                                  | <b>Yes</b>                               |
| <b>Cell cycle</b>                        | <b>Fast</b>                                 | <b>Slow</b>                              |
| <b>Robustness of engraftment</b>         | <b>20-30% vs CB</b>                         |                                          |
| <b>Functionality of mature cells</b>     | <b>30-60% vs CB</b>                         |                                          |
| <b>Expression level of HSC signature</b> | <b>30-80% vs CB</b>                         |                                          |
| <b>Molecular features</b>                | <b>Partial lineage program upon engraft</b> | <b>Full lineage program upon engraft</b> |

Table 1

Comparison of functional and molecular properties of HE-7TF cells and CB-HSCs.

Features of HE-7TF cells compared with CB-HSCs. The table summarizing the difference between HE-7TF cells and CB-HSCs. Consistent with molecular-level profiling, HE-7TF cells mediate shorter term engraftment and lower functionality than CB-HSCs, indicating potential opportunities for improvement.

|    |                 |
|----|-----------------|
| 1  | ENSG00000173585 |
| 2  | ENSG00000004468 |
| 3  | ENSG0000012124  |
| 4  | ENSG00000182866 |
| 5  | ENSG00000245848 |
| 6  | ENSG00000148400 |
| 7  | ENSG00000081059 |
| 8  | ENSG00000275122 |
| 9  | ENSG00000115085 |
| 10 | ENSG00000128218 |
| 11 | ENSG00000164105 |
| 12 | ENSG00000106004 |
| 13 | ENSG00000174059 |
| 14 | ENSG00000164687 |
| 15 | ENSG00000153563 |
| 16 | ENSG00000106006 |
| 17 | ENSG00000164330 |
| 18 | ENSG00000177455 |
| 19 | ENSG00000066336 |
| 20 | ENSG00000196549 |
| 21 | ENSG00000126756 |
| 22 | ENSG00000107485 |
| 23 | ENSG00000172005 |
| 24 | ENSG00000173762 |
| 25 | ENSG00000182742 |
| 26 | ENSG00000157404 |
| 27 | ENSG00000127152 |
| 28 | ENSG00000172673 |
| 29 | ENSG00000107447 |
| 30 | ENSG00000116824 |
| 31 | ENSG00000010610 |
| 32 | ENSG00000078399 |
| 33 | ENSG00000161405 |
| 34 | ENSG00000165702 |
| 35 | ENSG00000143995 |
| 36 | ENSG00000135363 |
| 37 | ENSG00000188846 |
| 38 | ENSG00000198851 |
| 39 | ENSG00000119866 |
| 40 | ENSG00000253293 |
| 41 | ENSG00000169575 |
| 42 | ENSG00000007062 |
| 43 | ENSG00000122592 |
| 44 | ENSG00000179348 |
| 45 | ENSG00000162676 |
| 46 | ENSG00000117400 |
| 47 | ENSG00000118513 |
| 48 | ENSG00000104903 |
| 49 | ENSG00000122025 |
| 50 | ENSG00000171611 |
| 51 | ENSG00000166349 |
| 52 | ENSG00000168685 |
| 53 | ENSG00000157554 |
| 54 | ENSG00000102145 |
| 55 | ENSG00000134954 |
| 56 | ENSG00000196092 |
| 57 | ENSG00000111275 |
| 58 | ENSG00000162367 |
| 59 | ENSG00000158477 |
| 60 | ENSG00000159216 |
| 61 | ENSG00000126353 |
| 62 | ENSG00000084774 |
